# Supplementary material
Source: MDPI journal article supplement (https://www.mdpi.com/2073-4352/12/11/1540)
Supplement: s1 [file s1]

Supplementary File

# Evaluation of Antioxidant, Cytotoxic, Mutagenic and Other Inhibitory Potentials of Green Synthesized Chitosan Nanoparticles

Narayanasamy Duraisamy <sup>1</sup>, Sangeetha Dhayalan <sup>1,\*</sup>, Mohammed Rafi Shaik <sup>2,\*</sup>, Althaf Hussain Shaik <sup>3</sup>, Jilani P. Shaik <sup>4</sup> and Baji Shaik <sup>5</sup>

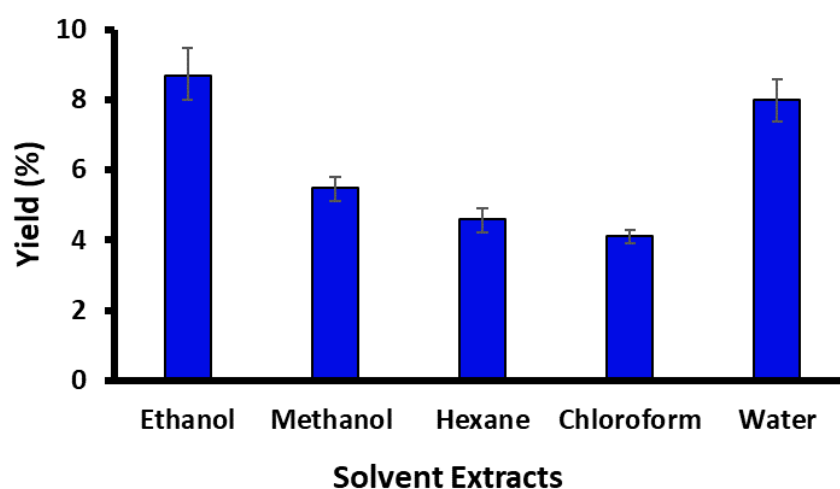

**Figure S1.** Different solvent extracts yield of *Martynia annua* Linn. stated values are mean and standard error of triplicates.

**Table S1.** Volume Distribution Table of DLS Results.

| Peak | Diameter (nm) | Stdandard Deviation |
|------|---------------|---------------------|
| 1    | 56.0          | 33.7                |
| 2    | 0.0           | 0.0                 |
| 3    | 0.0           | 0.0                 |
| 4    | 0.0           | 0.0                 |
| 5    | 56.0          | 33.7                |

## Cumulants Results

Diameter (d) : 130.7 (nm)

Polydispersity Index (P.I.) : 0.315

Diffusion Const. (D) : 3.783e-008 (cm<sup>2</sup>/sec)

## Measurement Condition

Temperature : 25.2 (°C)

Diluent Name : WATER

Refractive Index : 1.3328

Viscosity : 0.8838 (cP)

Scattering Intensity : 27579 (cps)

Attenuator 1 : 1.74 (%)
